# Supplementary material for: Efficiency enhanced rutile TiO2nanowire solar cells based on an Sb2S3absorber and a CuI hole conductor
Source: Royal Society of Chemistry journal article supplement (doi:10.1039/c5nj00299k), 2015-01-01
Supplement: c5nj00299k1.pdf [file c5nj00299k1.pdf]

## Supporting Information

for New Journal of Chemistry

### Efficiency enhanced rutile TiO<sub>2</sub> nanowire solar cells based on Sb<sub>2</sub>S<sub>3</sub> absorber and CuI hole conductor

Panpan Sun,<sup>a, b</sup> Xintong Zhang,<sup>\* a</sup> Lingling Wang,<sup>a</sup> Yongan Wei,<sup>a</sup> Changhua Wang,<sup>a</sup> Yichun Liu<sup>a</sup>

Fig. S1. Diffuse reflectance spectra of TiO<sub>2</sub> NW/Sb<sub>2</sub>S<sub>3</sub> films with different chemical bath deposition time. Inset shows the corresponding digital photographs of TiO<sub>2</sub> NW/Sb<sub>2</sub>S<sub>3</sub> films.

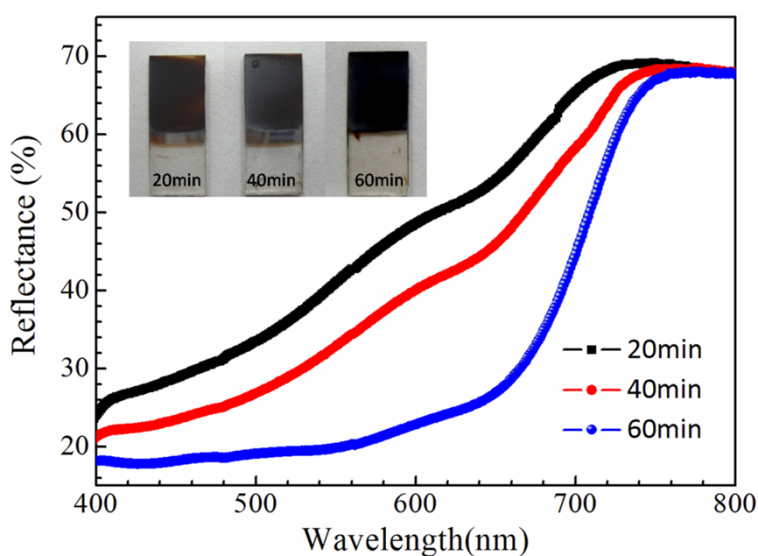

Fig. S2. IPCE characteristics of TiO<sub>2</sub>/Sb<sub>2</sub>S<sub>3</sub>/CuI-drop coating/Au devices with different deposition time of Sb<sub>2</sub>S<sub>3</sub> layer.

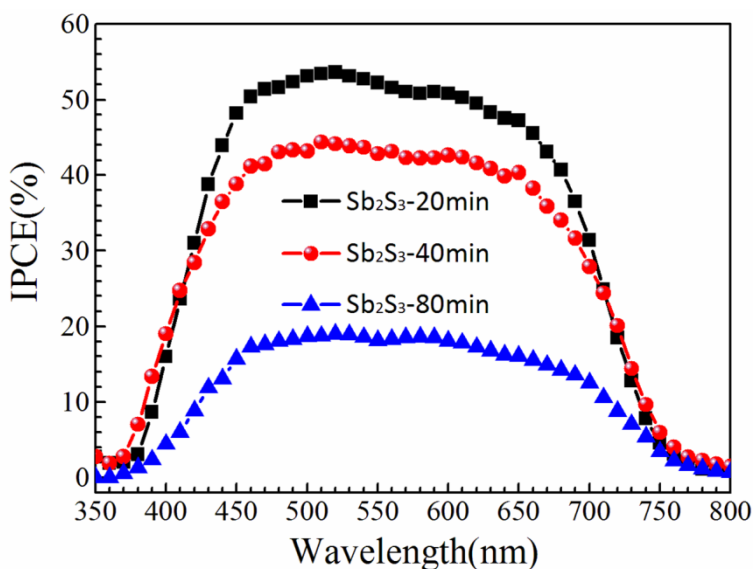

Fig. S3. J-V characteristics of two typical TiO<sub>2</sub> NW solar cells based on TiO<sub>2</sub>/N719/electrolyte/Pt and TiO<sub>2</sub>/N719/CuI-spray/Au structures under AM 1.5G solar simulator illumination.

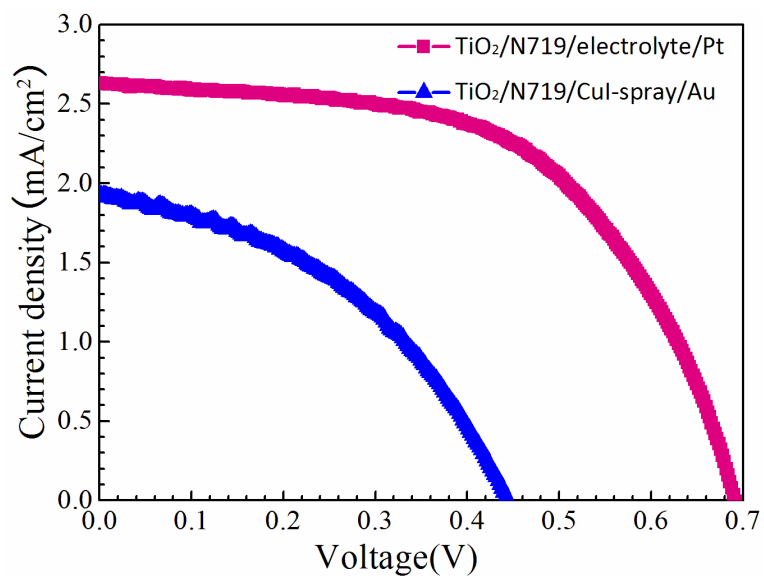

Table S1 Summary of device parameters under AM 1.5G solar simulator illumination.

| Cell Type                             | V <sub>oc</sub> /mV | J <sub>sc</sub> /mA cm <sup>-2</sup> | FF/% | η/%  |
|---------------------------------------|---------------------|--------------------------------------|------|------|
| TiO <sub>2</sub> /N719/electrolyte/Pt | 692                 | 2.63                                 | 56.6 | 1.03 |
| TiO <sub>2</sub> /N719/CuI-spray/Au   | 444                 | 1.93                                 | 47.9 | 0.41 |
